# Supplementary material
Source: PubMed Central journal article supplement (PMC10013929)

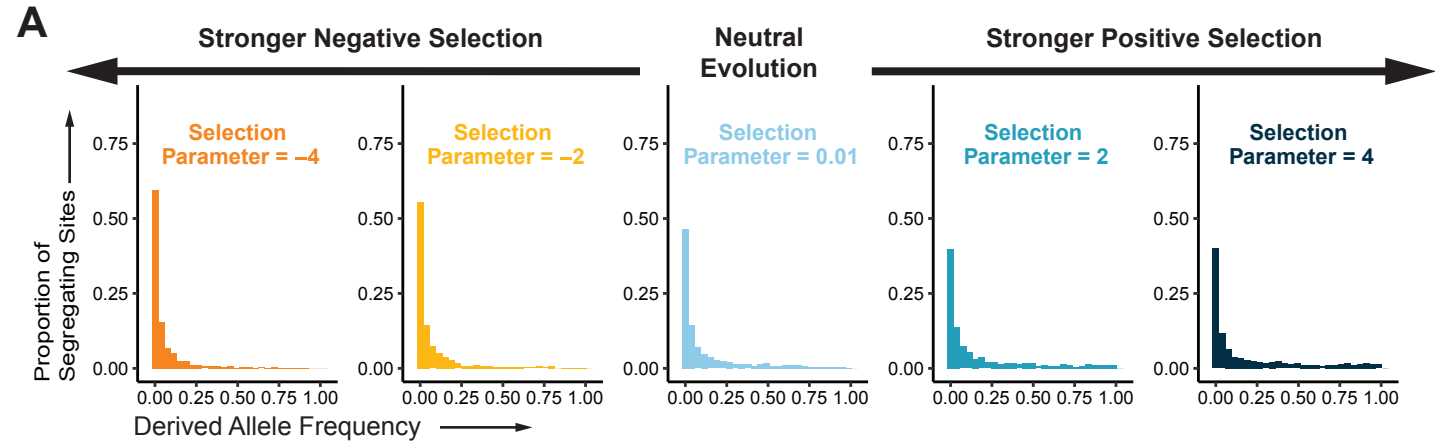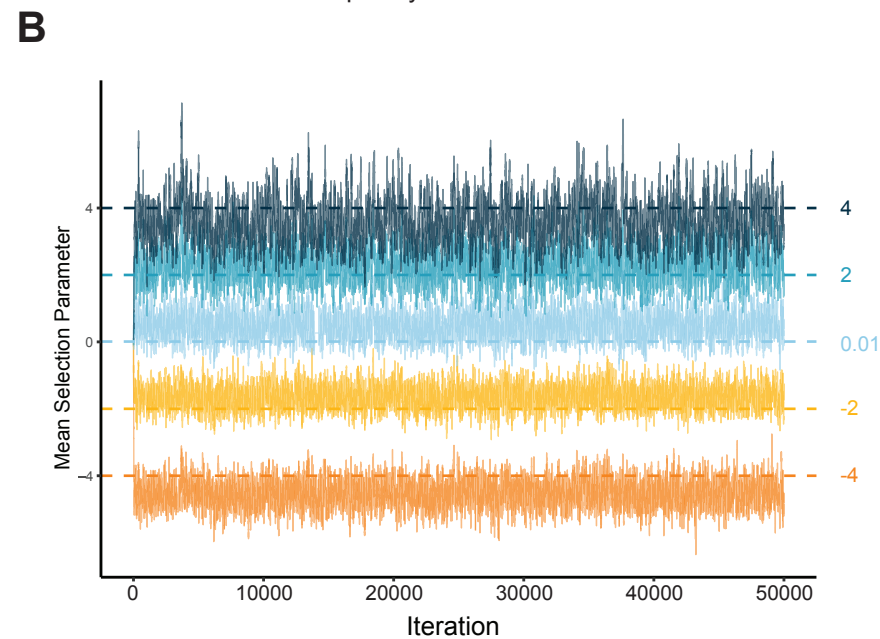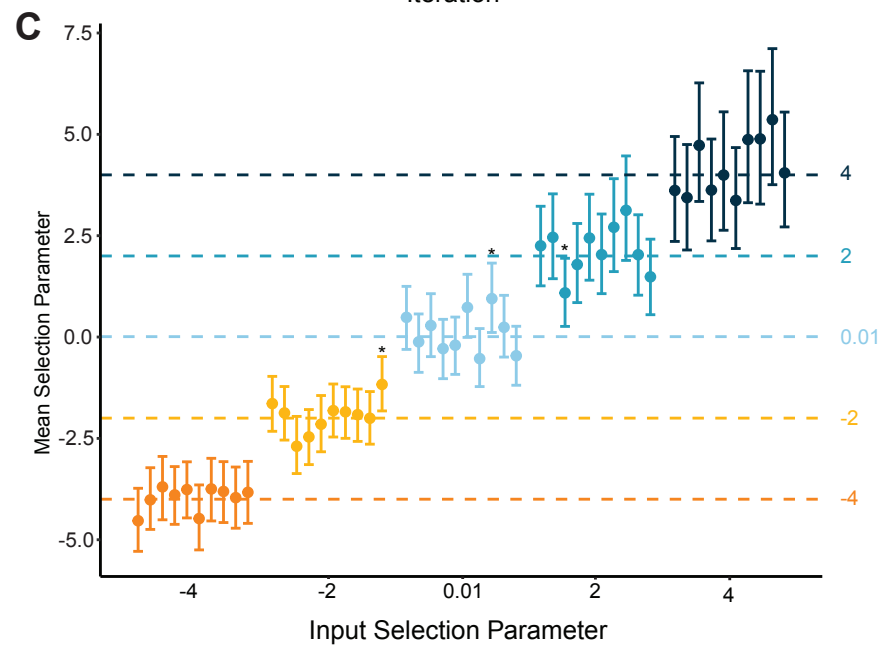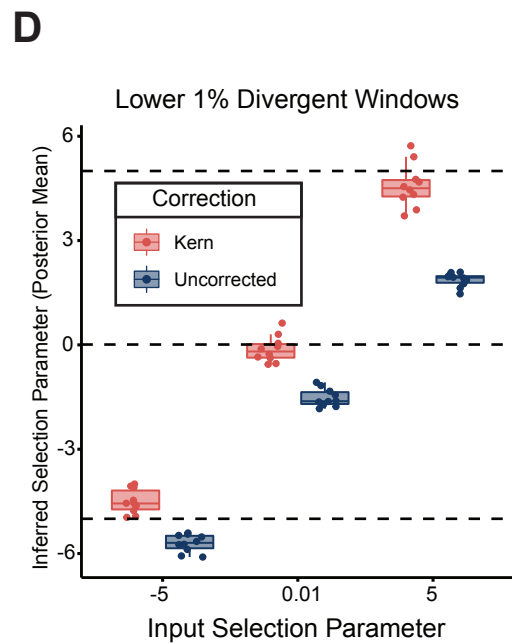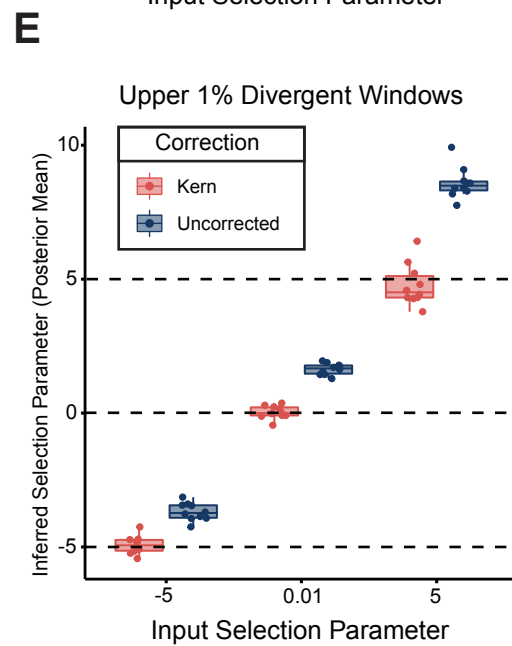

Supplement: NIHMS1844033-supplement-2.pdf [file NIHMS1844033-supplement-2.pdf]

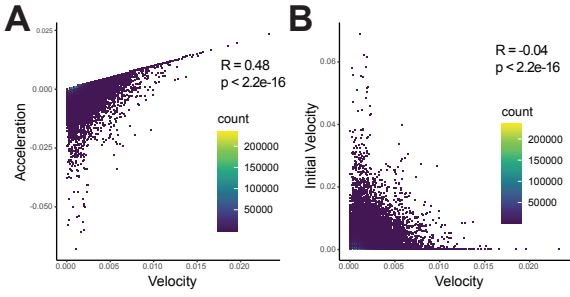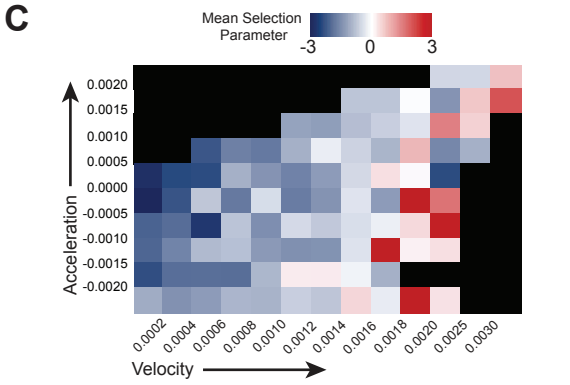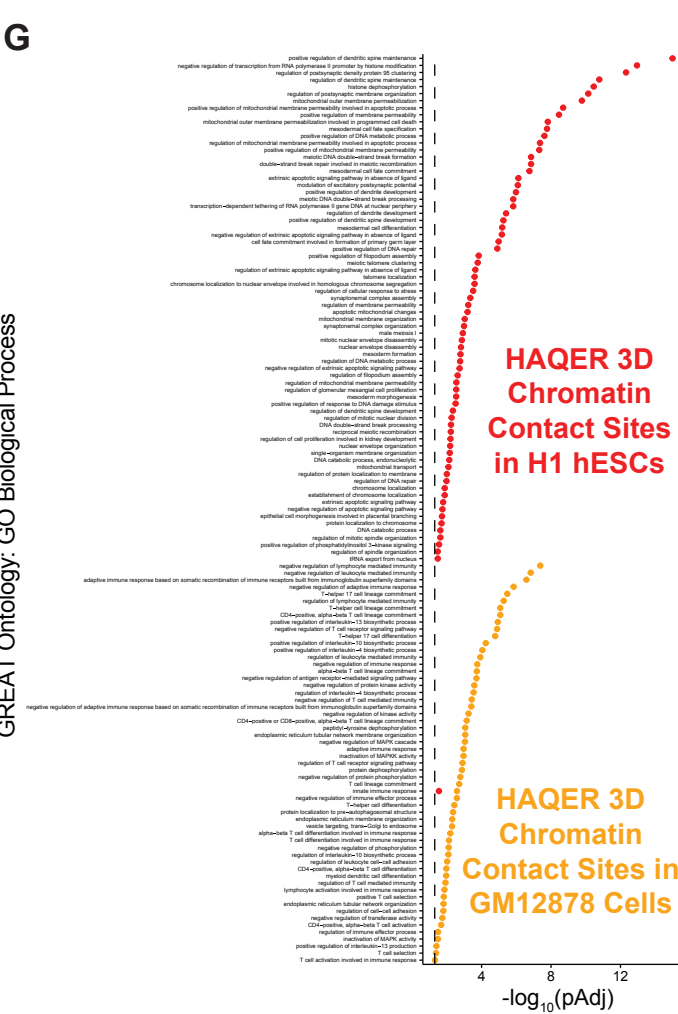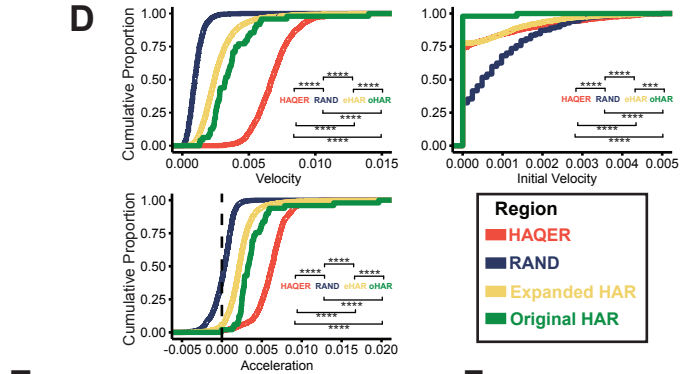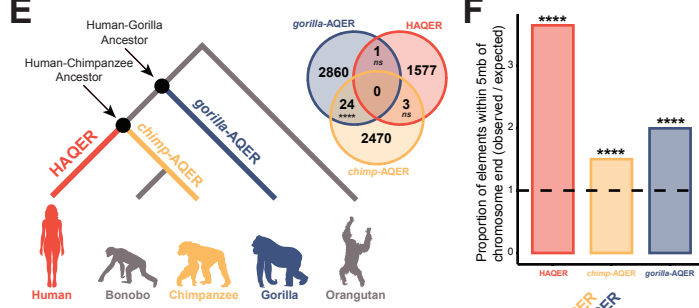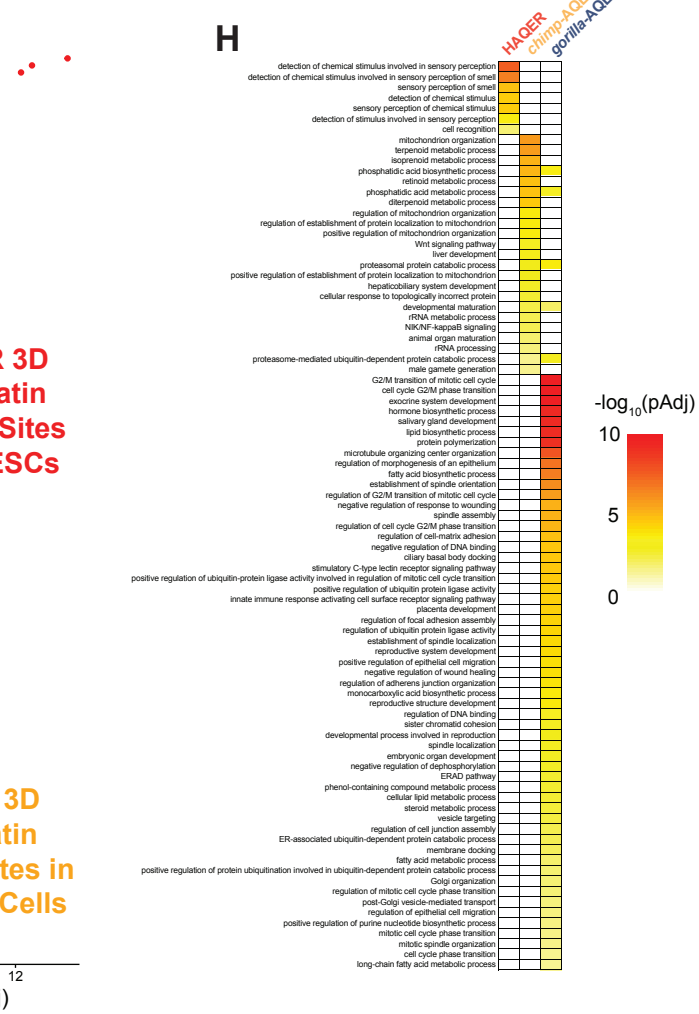

GREAT Ontology: GO Biological Process

Supplement: NIHMS1844033-supplement-3.pdf [file NIHMS1844033-supplement-3.pdf]

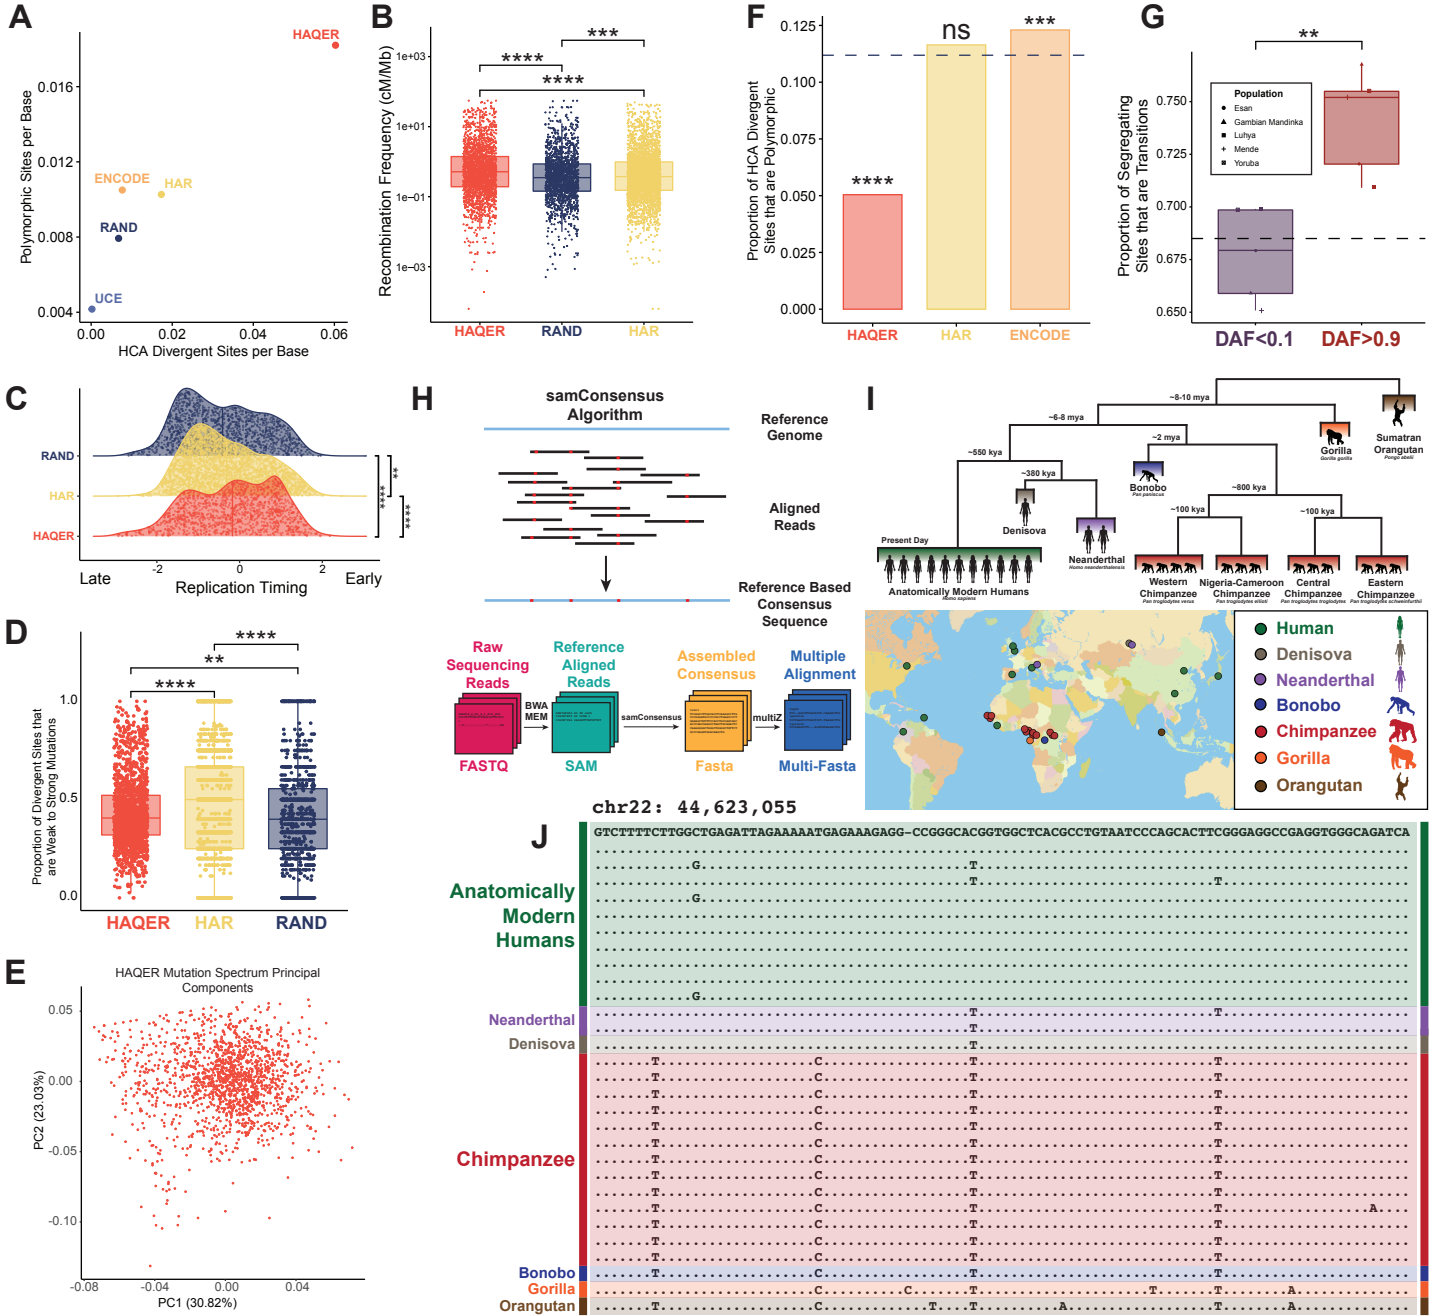

Supplement: NIHMS1844033-supplement-4.pdf [file NIHMS1844033-supplement-4.pdf]

**A**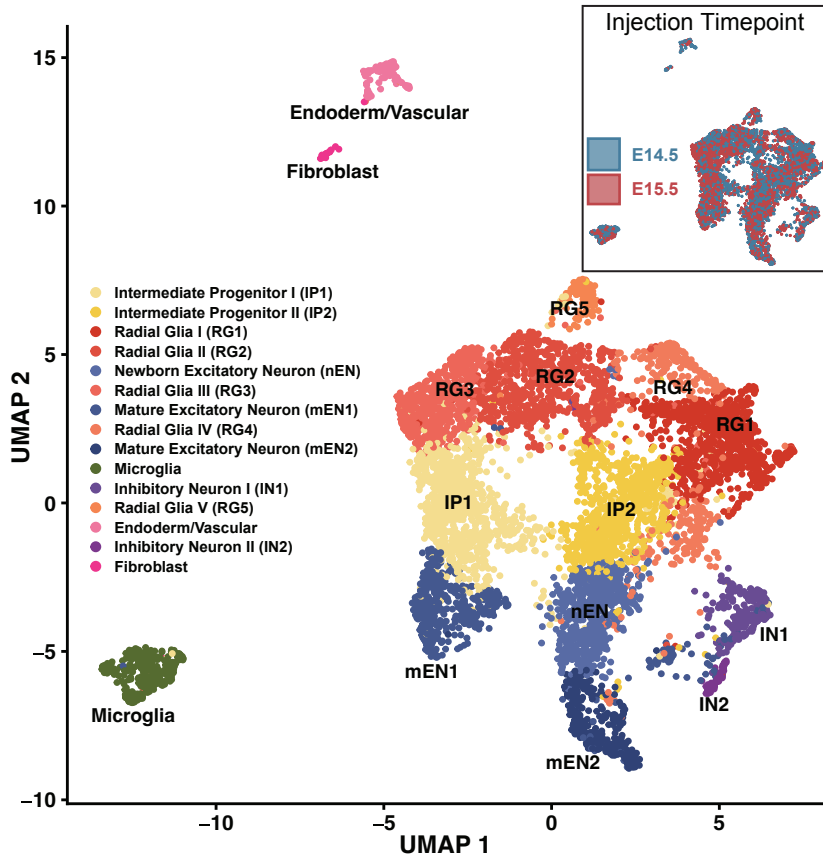**B**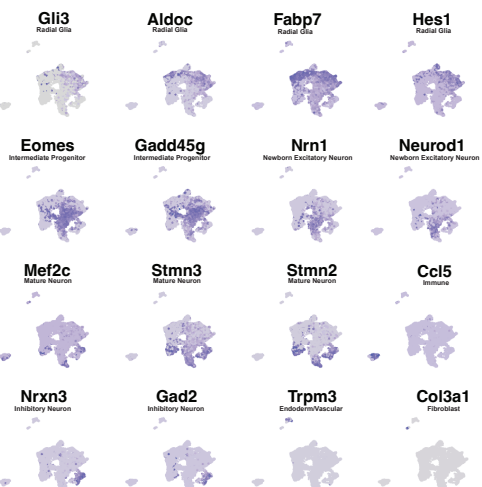**C**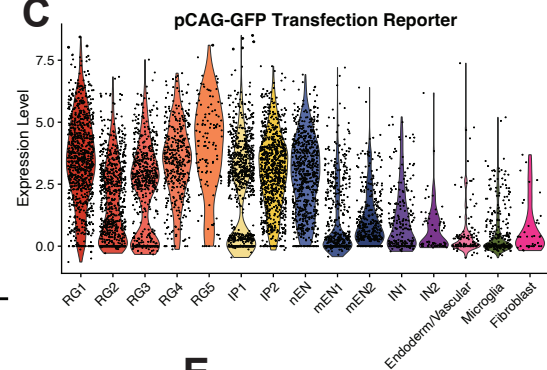**D**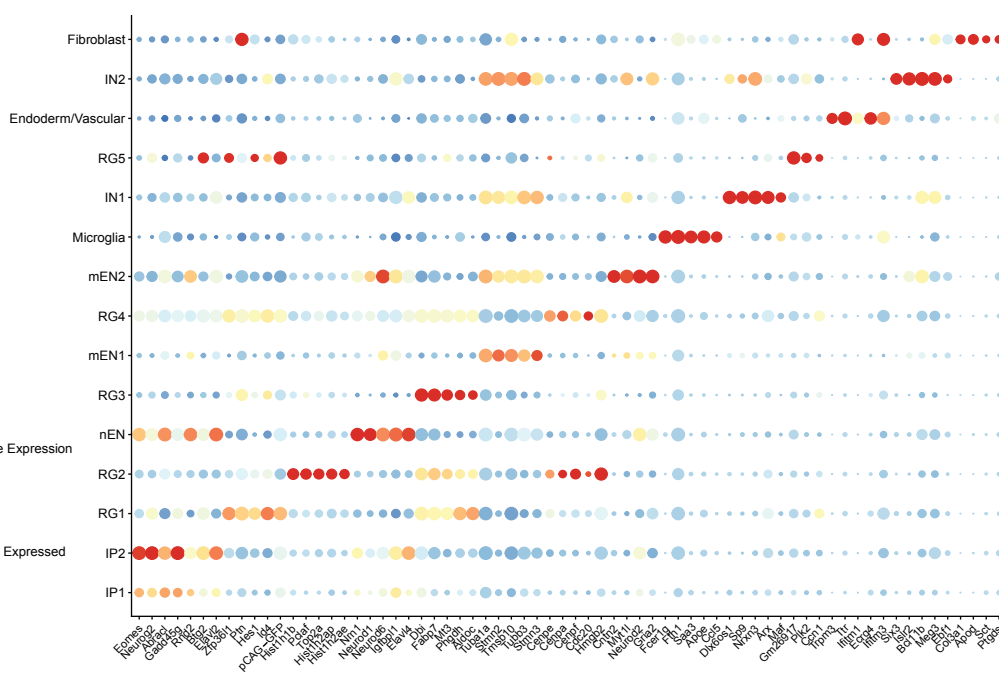**E**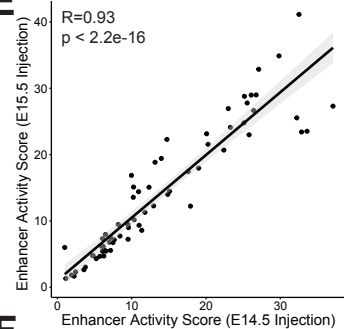**F**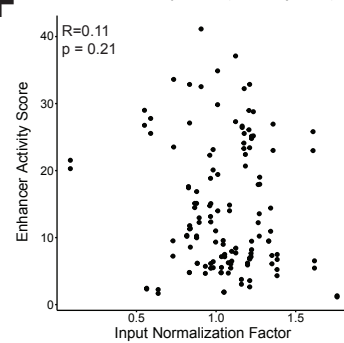

Supplement: NIHMS1844033-supplement-6.pdf [file NIHMS1844033-supplement-6.pdf]
